# Supplementary material for: Enriched environment prevents oxidative stress in zebrafish submitted to unpredictable chronic stress
Source: PeerJ. 2018 Jul 5;6:e5136. doi: 10.7717/peerj.5136 (PMC6035866; doi:10.7717/peerj.5136)
Supplement: Data S1 [file peerj-06-5136-s001.xlsx]

## Sheet: Raw data
Animal	Environment	Stress	TBARS	DCF	NPSH	SH	SOD	CAT
1	Barren	S-	0.846	2010	19.971	14.42	20.98	3.84428
2	Barren	S-	0.684	2035	16.148	14.819	21.92	1.90789
3	Barren	S-	0.79	1819	22.534	20.932	17.35	1.76734
4	Barren	S-	0.71	2046	20.357	21.42	20.66	2.9625
5	Barren	S-	0.97	1980	16.382	15.838	15.32	3.95
6	Barren	S+	1.4	2900	9.369	14.376	10.76	2.4415
7	Barren	S+	1.378	2335	14.73	14.332	8.02	2.75381
8	Barren	S+	1.562	2327	12.427	14.066	12	2.1208
9	Barren	S+	1.3	2576	10.785	16.325	9.72	2.84685
10	Barren	S+	1.1	2480	8.395	20.445	13.07	1.37691
11	EE21	S-	1.016	2465	11.496	15.678	24.46	5.41096
12	EE21	S-	0.908	1845	19.914	17.566	18.69	5.43656
13	EE21	S-	0.753	2066	19.781	15.838	27.03	7.00001
14	EE21	S-	0.835	1864	18.545	12.116	20.04	4.24161
15	EE21	S-	0.879	2501	12.87	14.243	27.96	3.55419
16	EE21	S+	1.087	670	14.686	17.787	9.24	5.37415
17	EE21	S+	0.89	901	18.496	13.711	11.17	2.75381
18	EE21	S+	0.843	802	14.553	17.61	19.5	4.61314
19	EE21	S+	1.127	741	14.287	18.274	12.16	4.16787
20	EE21	S+	1.088	884	16.724	17.167	13.52	3.73522
21	EE28	S-	1.039	1514	20.401	16.68	19.05	3.98791
22	EE28	S-	1.046	1086	16.325	16.502	19.49	5.98439
23	EE28	S-	0.946	1495	7.952	14.863	15.78	6.98575
24	EE28	S-	1.034	1832	16.591	12.825	20.32	4.46759
25	EE28	S-	0.888	1069	18.806	13.357	22.68	7.45677
26	EE28	S+	0.81	1161	19.781	19.603	18.58	3.46574
27	EE28	S+	1.078	890	13.667	18.678	13.71	2.37594
28	EE28	S+	0.957	1135	17.654	21.951	13.76	4.75839
29	EE28	S+	1.021	1306	20.445	16.458	20.03	3.53731
30	EE28	S+	0.79	1512	9.946	19.093	14.93	2.6715
